# Supplementary material for: Microbial Community Profiling Distinguishes Left-Sided and Right-Sided Colon Cancer
Source: PubMed Central journal article supplement (PMC7726112; doi:10.3389/fcimb.2020.498502), 2020-11-26
Supplement: DataSheet_1.pdf [file DataSheet_1.pdf]

Supplementary Table 1. Differential species between Harbin and Xiamen in the stool samples

| Species                                          | harbin(Mean abundance) | xiamen(Mean abundance) | fold(M-xiamen/M-harbin) | p-value  | q-value  |
|--------------------------------------------------|------------------------|------------------------|-------------------------|----------|----------|
| <i>Bifidobacterium animalis</i>                  | 2.81E-04               | 2.02E-01               | 7.19E+02                | 1.58E-08 | 8.05E-07 |
| <i>Prevotella buccae</i> D17                     | 2.67E-03               | 5.93E-01               | 2.22E+02                | 4.93E-08 | 1.08E-06 |
| <i>Clostridium baratii</i>                       | 2.79E-03               | 4.08E-01               | 1.46E+02                | 6.33E-08 | 1.08E-06 |
| <i>Acinetobacter radioresistens</i>              | 3.23E-01               | 1.32E-04               | 4.08E-04                | 1.00E-07 | 1.28E-06 |
| <i>Morganella morganii</i> subsp <i>morganii</i> | 1.52E-01               | 1.63E-04               | 1.07E-03                | 2.98E-07 | 2.15E-06 |
| <i>Clostridium thiosulfatireducens</i>           | 0.00E+00               | 3.00E-02               | Inf                     | 3.00E-07 | 2.15E-06 |
| <i>Odoribacter</i> sp <i>Marseille-P2698</i>     | 1.21E-02               | 1.43E-01               | 1.18E+01                | 3.16E-07 | 2.15E-06 |
| <i>Acinetobacter calcoaceticus</i>               | 1.72E-01               | 1.11E-04               | 6.41E-04                | 3.37E-07 | 2.15E-06 |
| bacterium <i>NLAE-zl-G313</i>                    | 4.26E-02               | 0.00E+00               | 0.00E+00                | 3.54E-06 | 2.01E-05 |
| <i>Prevotella intermedia</i>                     | 4.64E-02               | 5.52E-01               | 1.19E+01                | 4.52E-06 | 2.30E-05 |
| <i>Porphyromonas asaccharolytica</i>             | 6.91E-02               | 6.84E-05               | 9.90E-04                | 2.13E-05 | 9.86E-05 |
| <i>Haemophilus influenzae</i>                    | 0.00E+00               | 1.25E-02               | Inf                     | 2.74E-05 | 1.16E-04 |
| <i>Shewanella algae</i>                          | 0.00E+00               | 1.14E-02               | Inf                     | 7.53E-05 | 2.90E-04 |
| bacterium <i>endosymbiont of Onthophagus</i>     | 5.24E-02               | 7.63E-04               | 1.46E-02                | 7.95E-05 | 2.90E-04 |
| <i>Acinetobacter johnsonii</i>                   | 2.82E-02               | 2.16E-04               | 7.66E-03                | 1.04E-04 | 3.52E-04 |
| <i>Collinsella</i> sp <i>GD3</i>                 | 0.00E+00               | 7.45E-03               | Inf                     | 4.98E-04 | 1.59E-03 |
| <i>Bacteroides eggerthii</i>                     | 5.35E-03               | 6.71E-02               | 1.25E+01                | 6.61E-04 | 1.98E-03 |
| <i>Bacteroides coprocola</i> DSM 17136           | 5.73E-01               | 7.49E-01               | 1.31E+00                | 9.52E-04 | 2.70E-03 |
| <i>Collinsella aerofaciens</i>                   | 3.82E-02               | 1.50E-01               | 3.93E+00                | 1.26E-03 | 3.23E-03 |
| <i>Clostridium perfringens</i>                   | 4.99E-01               | 3.75E-02               | 7.52E-02                | 1.27E-03 | 3.23E-03 |
| <i>Bifidobacterium dentium</i>                   | 2.60E-02               | 5.49E-02               | 2.11E+00                | 2.28E-03 | 5.55E-03 |
| <i>Peptoclostridium difficile</i>                | 9.88E-02               | 1.58E-02               | 1.60E-01                | 3.72E-03 | 8.32E-03 |
| <i>Alistipes</i> sp <i>AL-1</i>                  | 3.59E-01               | 1.43E+00               | 3.99E+00                | 3.75E-03 | 8.32E-03 |
| <i>infirmum</i>                                  | 4.67E-04               | 8.94E-03               | 1.92E+01                | 5.14E-03 | 1.09E-02 |
| <i>scindens</i>                                  | 8.44E-02               | 1.63E-02               | 1.93E-01                | 7.04E-03 | 1.44E-02 |
| <i>Megasphaera micronuciformis</i>               | 3.23E-03               | 3.96E-02               | 1.23E+01                | 7.51E-03 | 1.47E-02 |
| <i>Sutterella wadsworthensis</i> 3 1 45B         | 2.47E-01               | 6.41E-02               | 2.60E-01                | 7.88E-03 | 1.48E-02 |
| <i>Bifidobacterium bifidum</i>                   | 1.15E-02               | 4.24E-02               | 3.69E+00                | 8.13E-03 | 1.48E-02 |
| <i>Bacteroides plebeius</i> DSM 17135            | 1.98E+00               | 4.21E-01               | 2.13E-01                | 9.00E-03 | 1.55E-02 |
| <i>Lactobacillus mucosae</i>                     | 5.05E-02               | 1.50E-01               | 2.98E+00                | 9.12E-03 | 1.55E-02 |
| <i>Ruminococcus</i> sp <i>15975</i>              | 8.34E-02               | 1.04E-02               | 1.25E-01                | 1.04E-02 | 1.72E-02 |

|                                           |          |          |          |          |          |
|-------------------------------------------|----------|----------|----------|----------|----------|
| Ruminococcus sp UNKMGS-30                 | 5.15E-02 | 1.60E-01 | 3.10E+00 | 1.27E-02 | 1.96E-02 |
| Parabacteroides faecis                    | 1.52E-02 | 2.01E-02 | 1.32E+00 | 1.27E-02 | 1.96E-02 |
| Bacteroides stercoris ATCC 43183          | 2.23E-03 | 1.11E-02 | 4.96E+00 | 2.94E-02 | 4.40E-02 |
| Clostridium sp                            | 8.47E-01 | 2.66E-01 | 3.14E-01 | 3.58E-02 | 5.22E-02 |
| Parabacteroides distasonis                | 3.17E+00 | 8.51E-01 | 2.69E-01 | 3.86E-02 | 5.46E-02 |
| Streptococcus gallolyticus subsp macedoni | 5.72E-02 | 1.09E-01 | 1.90E+00 | 4.78E-02 | 6.58E-02 |
| Lactobacillus salivarius                  | 6.48E-02 | 5.17E-02 | 7.98E-01 | 1.40E-01 | 1.88E-01 |
| Streptococcus anginosus subsp anginosus   | 6.76E-02 | 4.43E-02 | 6.55E-01 | 3.10E-01 | 4.05E-01 |
| Parabacteroides goldsteinii               | 1.16E+00 | 1.12E-01 | 9.58E-02 | 3.76E-01 | 4.79E-01 |
| Alistipes sp N15MGS-157                   | 4.68E-03 | 1.00E-02 | 2.14E+00 | 4.23E-01 | 5.26E-01 |
| Bacteroides vulgatus                      | 3.67E-01 | 4.31E-01 | 1.17E+00 | 4.69E-01 | 5.67E-01 |
| Dialister pneumosintes                    | 7.40E-02 | 3.53E-02 | 4.77E-01 | 4.81E-01 | 5.67E-01 |
| Desulfovibrio desulfuricans               | 7.46E-03 | 1.26E-02 | 1.69E+00 | 4.89E-01 | 5.67E-01 |
| Bacteroides thetaiotaomicron              | 1.47E+00 | 9.12E-01 | 6.19E-01 | 5.37E-01 | 6.09E-01 |
| Ruminococcus sp N15MGS-57                 | 2.77E-02 | 4.12E-03 | 1.49E-01 | 6.21E-01 | 6.79E-01 |
| gut metagenome                            | 6.59E-02 | 1.11E-01 | 1.68E+00 | 6.26E-01 | 6.79E-01 |
| Bifidobacterium longum subsp longum       | 3.77E-01 | 3.77E-01 | 1.00E+00 | 7.28E-01 | 7.63E-01 |
| Bacteroides uniformis                     | 1.83E+00 | 1.35E+00 | 7.38E-01 | 7.48E-01 | 7.63E-01 |
| human gut metagenome                      | 4.06E-01 | 1.55E-01 | 3.82E-01 | 7.48E-01 | 7.63E-01 |
| Bacteroides fragilis                      | 3.41E+00 | 1.61E+00 | 4.73E-01 | 8.51E-01 | 8.51E-01 |
