# Supplementary material for: Microbial Community Profiling Distinguishes Left-Sided and Right-Sided Colon Cancer
Source: PubMed Central journal article supplement (PMC7726112; doi:10.3389/fcimb.2020.498502), 2020-11-26
Supplement: DataSheet_2.pdf [file DataSheet_2.pdf]

Supplementary Table 2. Differential species between Harbin and Xiamen in the tumor samples

| Species                                          | harbin(Mean abundance) | xiamen(Mean abundance) | fold(M-xiamen/M-harbin) | p-value  | q-value  |
|--------------------------------------------------|------------------------|------------------------|-------------------------|----------|----------|
| <i>Rhizobium radiobacter</i>                     | 9.62E-04               | 2.82E-01               | 2.93E+02                | 1.12E-07 | 7.51E-06 |
| <i>Bromus tectorum</i>                           | 8.57E-05               | 1.23E-01               | 1.44E+03                | 1.79E-07 | 7.51E-06 |
| <i>Acinetobacter</i> sp_BFE41A                   | 2.39E-03               | 5.13E-01               | 2.15E+02                | 9.59E-07 | 2.69E-05 |
| <i>Streptococcus dysgalactiae</i> subsp_equisimi | 1.41E-02               | 2.58E+00               | 1.82E+02                | 3.54E-06 | 7.42E-05 |
| <i>Acinetobacter johnsonii</i>                   | 6.24E-04               | 8.55E-02               | 1.37E+02                | 1.24E-05 | 1.79E-04 |
| <i>Sphingomonas paucimobilis</i>                 | 3.10E-04               | 1.78E-01               | 5.75E+02                | 1.28E-05 | 1.79E-04 |
| <i>Sphingobium yanoikuyae</i>                    | 7.14E-05               | 8.12E-02               | 1.14E+03                | 2.71E-05 | 3.25E-04 |
| <i>Clostridium butyricum</i>                     | 1.66E-03               | 7.29E-02               | 4.39E+01                | 4.20E-05 | 4.41E-04 |
| <i>Bacteroides uniformis</i>                     | 2.77E+00               | 1.96E-01               | 7.06E-02                | 6.09E-05 | 5.69E-04 |
| <i>Parabacteroides distasonis</i>                | 3.38E+00               | 1.66E-01               | 4.93E-02                | 7.67E-05 | 6.44E-04 |
| <i>Prevotella intermedia</i>                     | 6.58E-02               | 1.17E+00               | 1.78E+01                | 2.20E-04 | 1.68E-03 |
| <i>Bifidobacterium bifidum</i>                   | 3.05E-04               | 1.13E-01               | 3.71E+02                | 3.47E-04 | 2.38E-03 |
| <i>Campylobacter gracilis</i>                    | 3.76E-04               | 9.69E-02               | 2.58E+02                | 3.69E-04 | 2.38E-03 |
| <i>Solanum torvum</i>                            | 1.46E-03               | 2.15E-02               | 1.47E+01                | 5.50E-04 | 3.30E-03 |
| <i>Flavobacterium</i> sp_YH1                     | 7.62E-05               | 2.93E-02               | 3.84E+02                | 6.55E-04 | 3.67E-03 |
| <i>Haemophilus influenzae</i>                    | 9.14E-04               | 3.16E-01               | 3.46E+02                | 1.14E-03 | 5.97E-03 |
| <i>Porites australiensis</i>                     | 6.05E-04               | 1.98E-01               | 3.28E+02                | 1.21E-03 | 5.99E-03 |
| <i>Parabacteroides</i> sp_D13                    | 4.09E-02               | 2.37E-03               | 5.80E-02                | 1.40E-03 | 6.31E-03 |
| <i>Fusobacterium nucleatum</i> subsp_animalis    | 6.38E-04               | 5.63E-02               | 8.83E+01                | 1.43E-03 | 6.31E-03 |
| <i>Ruminococcus</i> sp_15975                     | 1.13E-01               | 9.79E-03               | 8.66E-02                | 1.89E-03 | 7.94E-03 |
| <i>Parabacteroides merdae</i>                    | 2.65E+00               | 1.57E-01               | 5.93E-02                | 2.13E-03 | 8.54E-03 |
| <i>Haemophilus haemolyticus</i>                  | 3.81E-04               | 6.39E-02               | 1.68E+02                | 3.11E-03 | 1.19E-02 |
| <i>Lactobacillus murinus</i>                     | 2.38E-04               | 1.06E-01               | 4.43E+02                | 4.18E-03 | 1.53E-02 |
| <i>Bacteroides vulgatus</i>                      | 1.33E-01               | 9.37E-02               | 7.05E-01                | 5.48E-03 | 1.92E-02 |
| <i>Pseudomonas oryzihabitans</i>                 | 0.00E+00               | 1.71E-02               | Inf                     | 6.44E-03 | 2.16E-02 |
| <i>Porphyromonas asaccharolytica</i>             | 5.77E-02               | 5.78E-02               | 1.00E+00                | 1.14E-02 | 3.70E-02 |
| <i>Bacteroides thetaiotaomicron</i>              | 2.79E+00               | 1.37E+00               | 4.92E-01                | 1.26E-02 | 3.90E-02 |
| <i>Bifidobacterium breve</i>                     | 9.81E-04               | 3.62E-02               | 3.69E+01                | 1.33E-02 | 3.99E-02 |
| <i>Porphyromonas</i> sp_oral clone P4GB 100      | 8.38E-04               | 1.50E-01               | 1.79E+02                | 1.46E-02 | 4.23E-02 |
| <i>Lachnospiraceae bacterium</i> 615             | 3.43E-04               | 7.94E-02               | 2.32E+02                | 1.54E-02 | 4.31E-02 |
| <i>Parabacteroides goldsteinii</i>               | 1.43E+00               | 1.84E-01               | 1.29E-01                | 2.39E-02 | 6.49E-02 |

|                                             |          |          |          |          |          |
|---------------------------------------------|----------|----------|----------|----------|----------|
| Bacillus smithii                            | 0.00E+00 | 9.40E-02 | Inf      | 3.09E-02 | 8.10E-02 |
| Acinetobacter calcoaceticus                 | 1.05E-01 | 5.12E-02 | 4.88E-01 | 4.54E-02 | 1.16E-01 |
| Veillonella parvula                         | 1.91E-02 | 1.34E-02 | 7.01E-01 | 5.05E-02 | 1.23E-01 |
| bacterium NLAE-zl-G313                      | 4.88E-02 | 0.00E+00 | 0.00E+00 | 5.11E-02 | 1.23E-01 |
| Ruminococcus sp UNKMGS-30                   | 4.53E-02 | 9.17E-03 | 2.02E-01 | 5.54E-02 | 1.29E-01 |
| Lactobacillus aviarius                      | 0.00E+00 | 5.94E-03 | Inf      | 6.60E-02 | 1.50E-01 |
| Acinetobacter radioresistens                | 1.64E-02 | 8.42E-05 | 5.14E-03 | 8.91E-02 | 1.97E-01 |
| Sphingomonas aurantiaca                     | 8.57E-05 | 1.58E-02 | 1.84E+02 | 1.09E-01 | 2.35E-01 |
| Dialister pneumosintes                      | 8.16E-02 | 1.16E-01 | 1.42E+00 | 1.18E-01 | 2.47E-01 |
| unidentified eubacterium clone 342          | 1.34E-02 | 1.65E-01 | 1.22E+01 | 1.24E-01 | 2.54E-01 |
| aldenense                                   | 5.28E-02 | 7.62E-02 | 1.44E+00 | 1.27E-01 | 2.54E-01 |
| Pseudomonas pertucinogena                   | 0.00E+00 | 1.00E-02 | Inf      | 1.42E-01 | 2.73E-01 |
| Brachyspira sp NSH-25                       | 3.69E-03 | 1.69E-02 | 4.59E+00 | 1.44E-01 | 2.73E-01 |
| Solobacterium moorei                        | 5.16E-03 | 1.10E-01 | 2.12E+01 | 1.46E-01 | 2.73E-01 |
| Alistipes sp AL-1                           | 4.35E-01 | 2.97E-01 | 6.84E-01 | 1.50E-01 | 2.74E-01 |
| Bifidobacterium longum subsp longum         | 2.76E-01 | 1.57E-01 | 5.68E-01 | 1.55E-01 | 2.76E-01 |
| bacterium endosymbiont of Onthophagus       | 1.33E-02 | 5.84E-03 | 4.40E-01 | 1.81E-01 | 3.17E-01 |
| Streptococcus anginosus subsp anginosus     | 5.14E-02 | 2.72E-01 | 5.30E+00 | 2.09E-01 | 3.59E-01 |
| Stenotrophomonas rhizophila                 | 8.57E-05 | 6.39E-03 | 7.46E+01 | 2.42E-01 | 4.06E-01 |
| unidentified rumen bacterium 12-124         | 2.71E-04 | 2.48E-02 | 9.12E+01 | 2.75E-01 | 4.43E-01 |
| leptum                                      | 3.43E-04 | 2.30E-02 | 6.71E+01 | 2.75E-01 | 4.43E-01 |
| Bacteroides plebeius DSM 17135              | 1.87E+00 | 1.87E+00 | 1.00E+00 | 3.10E-01 | 4.43E-01 |
| Eubacterium ramulus                         | 8.60E-02 | 1.39E-01 | 1.62E+00 | 3.13E-01 | 4.43E-01 |
| Treponema denticola                         | 0.00E+00 | 1.95E-02 | Inf      | 3.17E-01 | 4.43E-01 |
| Treponema succinifaciens DSM 2489           | 0.00E+00 | 1.84E-02 | Inf      | 3.17E-01 | 4.43E-01 |
| Lactobacillus harbinensis                   | 0.00E+00 | 1.22E-02 | Inf      | 3.17E-01 | 4.43E-01 |
| Paraburkholderia kururiensis subsp kururien | 0.00E+00 | 1.16E-02 | Inf      | 3.17E-01 | 4.43E-01 |
| delta proteobacterium WX152                 | 0.00E+00 | 9.99E-03 | Inf      | 3.17E-01 | 4.43E-01 |
| Lactobacillus agilis                        | 0.00E+00 | 6.25E-03 | Inf      | 3.17E-01 | 4.43E-01 |
| Bacteroides coprocola DSM 17136             | 6.21E-01 | 4.28E-01 | 6.89E-01 | 3.35E-01 | 4.62E-01 |
| Odoribacter sp Marseille-P2698              | 2.28E-02 | 0.00E+00 | 0.00E+00 | 3.68E-01 | 4.98E-01 |
| Clostridium sp                              | 7.43E-01 | 4.03E-01 | 5.42E-01 | 4.05E-01 | 5.40E-01 |
| Bacteroides fragilis                        | 3.46E+00 | 4.02E+00 | 1.16E+00 | 4.52E-01 | 5.94E-01 |
| Parabacteroides faecis                      | 1.69E-02 | 1.01E-02 | 5.99E-01 | 4.99E-01 | 6.35E-01 |
| Bifidobacterium dentium                     | 1.70E-02 | 8.72E-02 | 5.13E+00 | 5.03E-01 | 6.35E-01 |

|                                           |          |          |          |          |          |
|-------------------------------------------|----------|----------|----------|----------|----------|
| Bacillus_coagulans                        | 5.86E-04 | 1.03E-01 | 1.75E+02 | 5.14E-01 | 6.35E-01 |
| bacterium_YE57                            | 1.00E-04 | 6.83E-03 | 6.83E+01 | 5.14E-01 | 6.35E-01 |
| human_gut_metagenome                      | 1.39E-02 | 1.21E-02 | 8.70E-01 | 6.20E-01 | 7.54E-01 |
| Klebsiella_oxytoca                        | 4.53E-03 | 3.48E-02 | 7.68E+00 | 6.35E-01 | 7.62E-01 |
| Klebsiella_variicola                      | 8.61E-01 | 2.61E-01 | 3.04E-01 | 7.68E-01 | 9.09E-01 |
| Clostridium_perfringens                   | 3.31E-01 | 2.26E-01 | 6.83E-01 | 7.96E-01 | 9.28E-01 |
| gut_metagenome                            | 4.40E-02 | 5.21E-01 | 1.18E+01 | 8.25E-01 | 9.49E-01 |
| Streptococcus_gallolyticus_subsp_macedoni | 3.10E-02 | 2.28E-01 | 7.33E+00 | 8.38E-01 | 9.51E-01 |
| Lactobacillus_fermentum                   | 7.43E-04 | 1.61E-02 | 2.16E+01 | 8.50E-01 | 9.53E-01 |
| Lactobacillus_mucosae                     | 2.05E-02 | 3.43E-02 | 1.67E+00 | 9.01E-01 | 9.57E-01 |
| Bacteroides_eggerthii                     | 6.19E-03 | 2.93E-02 | 4.74E+00 | 9.11E-01 | 9.57E-01 |
| Clostridium_baratii                       | 3.13E-03 | 2.44E-02 | 7.81E+00 | 9.23E-01 | 9.57E-01 |
| Bifidobacterium_adolescentis              | 9.70E-03 | 4.00E-03 | 4.13E-01 | 9.31E-01 | 9.57E-01 |
| Streptococcus_mutans                      | 7.57E-04 | 1.09E-02 | 1.44E+01 | 9.38E-01 | 9.57E-01 |
| mouse_gut_metagenome                      | 1.38E-04 | 1.34E-02 | 9.70E+01 | 9.43E-01 | 9.57E-01 |
| Collinsella_sp_GD3                        | 7.62E-05 | 5.64E-03 | 7.41E+01 | 9.43E-01 | 9.57E-01 |
| scindens                                  | 8.01E-02 | 1.55E-01 | 1.94E+00 | 9.46E-01 | 9.57E-01 |
| Lactobacillus_salivarius                  | 2.30E-02 | 4.09E-02 | 1.78E+00 | 9.76E-01 | 9.76E-01 |
