# Supplementary material for: Microbial Community Profiling Distinguishes Left-Sided and Right-Sided Colon Cancer
Source: PubMed Central journal article supplement (PMC7726112; doi:10.3389/fcimb.2020.498502), 2020-11-26
Supplement: DataSheet_3.pdf [file DataSheet_3.pdf]

Supplementary Table 3. Alpha diversity index in Xiamen and Harbin.

| Group                   | alpha diversity index | P value  |
|-------------------------|-----------------------|----------|
| Harbin-VS-Xiamen(feces) | Chao1                 | 1.24E-04 |
|                         | Ace                   | 7.20E-05 |
|                         | Sobs                  | 8.68E-04 |
| Harbin-VS-Xiamen(tumor) | Chao1                 | 3.36E-02 |
|                         | Ace                   | 2.17E-02 |
